# Supplementary material for: Developability studies before initiation of process development: Improving manufacturability of monoclonal antibodies
Source: PubMed Central journal article supplement — MAbs. 2013 Jun 7;5(5):787–94. doi: 10.4161/mabs.25269 (PMC3851230; doi:10.4161/mabs.25269), 2013-06-07
Supplement: mabs-5-787-s01.pdf [file mabs-5-787-s01.pdf]

## **Supplemental Material to:**

**Xiaoyu Yang, Wei Xu, Svetlana Dukleska,  
Sabrina Benchaar, Selina Mengisen, Valentyn  
Antochshuk, Jason Cheung, Leslie Mann, Zulfia  
Babadjanova, Jason Rowand, Rico Gunawan,  
Alexander McCampbell, Maribel Beaumont,  
David Meininger, Daisy Richardson and  
Alexandre Ambrogelly**

**Developability studies before initiation of process  
development: Improving manufacturability of monoclonal  
antibodies**

**mAbs 2013; 5(5)**

**<http://dx.doi.org/10.4161/mabs.25269>**

**<http://www.landesbioscience.com/journals/mabs/article/25269/>**

Table S1: Assay Summary Table

| Assay              | Development needed | Typical material requirement | Throughput |
|--------------------|--------------------|------------------------------|------------|
| UV                 | No                 | 250 µg                       | High       |
| IEX-HPLC           | Yes                | 80 µg                        | Low        |
| SEC-HPLC           | No                 | 25 µg                        | Low        |
| Pep. mapping LC-MS | Yes                | 200 µg                       | Low        |
| Potency (ELISA)    | Yes                | 500 µg                       | Low        |
